# Supplementary material for: Retrospective study of the immunogenicity and safety of the CoronaVac SARS-CoV-2 vaccine in people with underlying medical conditions
Source: PubMed Central journal article supplement (PMC9700702; doi:10.1038/s43856-022-00216-2), 2022-11-25
Supplement: 43856_2022_216_MOESM5_ESM.pdf [file 43856_2022_216_MOESM5_ESM.pdf]

## Description of Additional Supplementary Files

**File Name:** Supplementary Data 1

**Description:** The adverse events reported within 14 days post the first dose and the second dose of the vaccination 969 participants. The source data for main Figure 2.

**File Name:** Supplementary Data 2

**Description:** Titers of neutralizing antibodies to live SARS-CoV-2 virus (wild type) induced 14-28 days, 90 days, and 180 days after two-dose CoronaVac. The source data for main Figure 3.

**File Name:** Supplementary Data 3

**Description:** The SARS-CoV-2-specific T cell responses after 3 months, and 6 months after two-dose CoronaVac, quantified by AIM assays. The source data for main Figure 4.
